# Supplementary material for: HER2 Overexpression and Cytogenetical Patterns in Canine Mammary Carcinomas
Source: MDPI journal article supplement (doi:10.3390/vetsci9110583), 2022-10-22

**Table S1.** FISH method details.

| Permeation                                                               | Digestion                                        | Probes                                                                               | Denaturation   | Hybridization  | Stringency                                                  |
|--------------------------------------------------------------------------|--------------------------------------------------|--------------------------------------------------------------------------------------|----------------|----------------|-------------------------------------------------------------|
| Citrate buffer<br>pH 8.00 in<br>microwave at<br>750W for 5 min<br>30 sec | HCl pepsine at<br>37°C for 19<br>min and 30 sec. | <i>HER2</i> (red),<br><i>CRYBA1</i> (green)<br>(Empire Genomic<br>LLC, Buffalo, NY). | 83°C for 3 min | 37°C overnight | NP40<br>1.5%/2×SSC<br>(pH 7.0–7.5)<br>at 65°C for 50<br>sec |

**Table S2: HER2, ER, KI67 data in canine mammary carcinoma.**

[illegible]

|              |   |                                             |   |      |      |   |   |   |       |    |    |        |    |
|--------------|---|---------------------------------------------|---|------|------|---|---|---|-------|----|----|--------|----|
| AP607<br>5-1 | 1 | complex<br>carcinoma                        | 1 | 1.93 | 1.88 | 0 | 0 | 0 | 1.03  | 0  | 0  | nd     | nd |
| AP616<br>2-1 | 3 | inflammator<br>y carcinoma                  | 1 | 2.35 | 1.95 | 0 | 0 | 0 | 1.2   | 0  | 0  | 57.49% | 0  |
| AP618<br>7   | 3 | simple solid<br>carcinoma                   | 2 | 1.4  | 1.81 | 0 | 0 | 0 | 0.77  | 0  | 0  | 10.60% | 0  |
| AP679<br>4   | 2 | complex<br>carcinoma                        | 0 | nd   | nd   | 0 | 0 | 0 | nd    | nd | nd | nd     | nd |
| AP682<br>5   | 1 | mixed<br>carcinoma                          | 0 | 1.93 | 1.81 | 0 | 0 | 0 | 1.07  | 0  | 0  | 9.82%  | 0  |
| AP699<br>6   | 1 | complex<br>carcinoma                        | 1 | 1.55 | 1.73 | 0 | 0 | 0 | 0.89  | 0  | 0  | 18.53% | 3  |
| AP701<br>1   | 1 | mixed<br>carcinoma                          | 1 | 1.62 | 1.77 | 1 | 0 | 1 | 0.91  | 0  | 0  | 6.86%  | 0  |
| AP712<br>2   | 1 | simple<br>tubulo-<br>papillary<br>carcinoma | 1 | 1.62 | 1.77 | 1 | 0 | 0 | 0.91  | 0  | 0  | 3.02%  | 0  |
| AP730<br>8-7 | 2 | simple solid<br>carcinoma                   | 0 | 4.43 | 2.57 | 0 | 0 | 0 | 1.72  | 0  | 0  | 38.33% | 0  |
| AP735<br>9   | 1 | mixed<br>carcinoma                          | 3 | 2.06 | 1.93 | 1 | 0 | 0 | 1.06  | 0  | 0  | 30.49% | 5  |
| AP753<br>0   | 3 | adenosquam<br>ous<br>carcinoma              | 1 | 2.23 | 1.21 | 0 | 0 | 0 | 1.84  | 0  | 0  | 17.09% | 3  |
| AP755<br>9   | 1 | simple<br>tubular<br>carcinoma              | 3 | 2.05 | 2    | 0 | 0 | 0 | 1.025 | 0  | 0  | 18.83% | 5  |
| AP762<br>8   | 1 | simple<br>tubulo-<br>papillary<br>carcinoma | 2 | 1.68 | 1.8  | 0 | 0 | 0 | 0.94  | 0  | 0  | nd     | nd |
| AP778<br>9   | 1 | mixed<br>carcinoma                          | 3 | 2,6  | 2,53 | 0 | 0 | 0 | 1.082 | 0  | 0  | 4.12%  | 0  |
| AP786<br>8-1 | 3 | simple solid<br>carcinoma                   | 3 | 1.71 | 1.94 | 1 | 0 | 0 | 0.88  | 0  | 0  | 63.80% | 0  |
| AP786<br>8-2 | 3 | simple<br>tubulo-<br>papillary<br>carcinoma | 3 | 1,85 | 1,69 | 0 | 0 | 0 | 1,09  | 0  | 0  | 5.85%  | 6  |
| AP786<br>8-3 | 1 | complex<br>carcinoma                        | 2 | 2    | 2,29 | 1 | 0 | 0 | 0.88  | 0  | 0  | nd     | nd |
| AP798<br>6   | 1 | mixed<br>carcinoma                          | 2 | 2.81 | 1.78 | 1 | 0 | 0 | 1.58  | 0  | 0  | 12.15% | nd |

|                |   |                                             |   |            |      |   |   |   |      |   |    |        |    |
|----------------|---|---------------------------------------------|---|------------|------|---|---|---|------|---|----|--------|----|
| AP804<br>3     | 1 | intraduttal<br>papillary<br>carcinoma       | 2 | 1.75       | 1.78 | 1 | 0 | 0 | 0.99 | 0 | 0  | 10.23% | 0  |
| AP809<br>0     | 3 | comedocarci<br>noma                         | 3 | 2.73       | 2.93 | 0 | 0 | 0 | 0.93 | 0 | 0  | 26.33% | 0  |
| AP810<br>2     | 2 | complex<br>carcinoma                        | 3 | 5.28       | 2.03 | 0 | 0 | 0 | 2.59 | 1 | 1  | nd     | nd |
| AP815<br>3-2M  | 1 | complex<br>carcinoma                        | 3 | 4          | 3.05 | 0 | 0 | 0 | 1.31 | 0 | 0  | 4.49%  | 0  |
| AP815<br>3-3M1 | 1 | complex<br>carcinoma                        | 2 | 1.85       | 2.08 | 0 | 0 | 0 | 0.89 | 0 | 0  | 6.29%  | 0  |
| AP815<br>3-3M2 | 1 | complex<br>carcinoma                        | 2 | 1.33       | 1.38 | 0 | 0 | 0 | 0.96 | 0 | 0  | 7.92%  | 0  |
| AP815<br>3-4M  | 1 | complex<br>carcinoma                        | 2 | 2.81       | 1.9  | 1 | 0 | 0 | 1.47 | 0 | 0  | 6.14%  | 0  |
| AP819<br>8     | 1 | complex<br>carcinoma                        | 1 | 2.54       | 3.38 | 0 | 0 | 1 | 0.75 | 0 | 0  | 28.17% | 4  |
| AP864<br>3     | 1 | complex<br>carcinoma                        | 3 | 3.21       | 2.69 | 0 | 0 | 0 | 1.19 | 0 | 0  | 10.67% | 3  |
| AP879<br>7     | 2 | complex<br>carcinoma                        | 2 | 2.09       | 1.72 | 0 | 0 | 0 | 1.21 | 0 | 0  | 17.62% | 3  |
| AP880<br>9     | 1 | complex<br>carcinoma                        | 3 | 3.70<br>37 | nd   | 0 | 0 | 0 | nd   | 0 | nd | nd     | nd |
| AP882<br>3     | 2 | simple solid<br>carcinoma                   | 3 | 3.27       | 3.2  | 0 | 0 | 1 | 1.02 | 0 | 0  | 23.84% | 7  |
| AP884<br>5     | 3 | simple solid<br>carcinoma                   | 1 | 1.65       | 1.74 | 0 | 0 | 0 | 0.95 | 0 | 0  | 50.92% | 0  |
| AP886<br>8     | 1 | mixed<br>carcinoma                          | 2 | 2.5        | 2.19 | 0 | 0 | 0 | 1.14 | 0 | 0  | 8.51%  | 0  |
| AP886<br>9     | 3 | comedocarci<br>noma                         | 2 | 2.7        | 2.56 | 0 | 0 | 0 | 1.06 | 0 | 0  | 37.60% | 0  |
| AP887<br>5     | 1 | complex<br>carcinoma                        | 3 | 3.44       | 2.55 | 0 | 0 | 0 | 1.34 | 0 | 0  | 18.46% | 0  |
| AP887<br>6     | 1 | complex<br>carcinoma                        | 1 | 7.18       | 4.95 | 0 | 0 | 1 | 1.45 | 1 | 0  | 3.90%  | 6  |
| AP888<br>4     | 1 | complex<br>carcinoma                        | 3 | 2.18       | 2.18 | 0 | 0 | 0 | 1    | 0 | 0  | 14.84% | 6  |
| AP895<br>5     | 1 | simple<br>tubular<br>carcinoma              | 2 | 1.33       | 1.54 | 0 | 0 | 0 | 0.86 | 0 | 0  | 34.16% | 6  |
| AP920<br>7     | 3 | simple<br>tubulo-<br>papillary<br>carcinoma | 1 | 15.5<br>2  | 2.91 | 0 | 1 | 0 | 5.33 | 1 | 1  | 14.31% | 0  |

|           |   |                                   |   |      |      |    |    |    |      |    |    |        |    |
|-----------|---|-----------------------------------|---|------|------|----|----|----|------|----|----|--------|----|
| AP9208    | 1 | mixed carcinoma                   | 2 | 2.42 | 2.08 | 0  | 0  | 0  | 1.17 | 0  | 0  | 8.49%  | 0  |
| AP9210    | 1 | mixed carcinoma                   | 2 | 2.29 | 2.45 | 1  | 0  | 0  | 0.93 | 0  | 0  | 14.42% | 3  |
| AP9393    | 2 | mixed carcinoma                   | 2 | 4.9  | 2.33 | 0  | 0  | 0  | 2.1  | 1  | 1  | 21.70% | 0  |
| AP9398-1  | 1 | complex carcinoma                 | 2 | 2.27 | 3.16 | 0  | 0  | 0  | 0.72 | 0  | 0  | 24.04% | 0  |
| AP9398-5  | 2 | simple tubulo-papillary carcinoma | 1 | 5.4  | 4.88 | 0  | 0  | 1  | 1.1  | 0  | 0  | 29.50% | 0  |
| AP9485    | 1 | complex carcinoma                 | 2 | 2.67 | 2.5  | 0  | 0  | 0  | 1.06 | 0  | 0  | 21.72% | 0  |
| AP9581    | 3 | comedocarcinoma                   | 1 | nd   | nd   | nd | nd | nd | nd   | nd | nd | 53.69% | 0  |
| AP9596-1  | 2 | intraduttal papillary carcinoma   | 2 | 1.91 | 1.74 | 0  | 0  | 0  | 1.1  | 0  | 0  | 29.19% | 0  |
| 146/14    | 1 | simple tubular carcinoma          | 1 | 2.45 | 2.45 | 0  | 0  | 0  | 1    | 0  | 0  | 57.00% | 0  |
| 221/144-1 | 3 | simple solid carcinoma            | 2 | 1.8  | 1.27 | 1  | 0  | 0  | 1.41 | 0  | 0  | 17     | nd |
| 221/144-2 | 3 | comedocarcinoma                   | 2 | 2    | 2    | 1  | 0  | 0  | 1    | 0  | 0  | 14     | 0  |
| 518/14    | 1 | mixed carcinoma                   | 0 | 1.44 | 1.6  | 0  | 0  | 0  | 0.9  | 0  | 0  | 12     | 4  |
| 018/15    | 1 | simple tubulo-papillary carcinoma | 0 | nd   | nd   | 0  | 0  | 0  | nd   | nd | nd | 5      | 0  |
| 030/15D   | 3 | simple solid carcinoma            | 2 | 5.54 | 2.02 | 0  | 0  | 0  | 2.73 | 1  | 1  | 49     | 0  |
| 054/15A   | 1 | complex carcinoma                 | 1 | nd   | nd   | 0  | 0  | 0  | nd   | nd | nd | 7      | 3  |
| 057/15    | 2 | complex carcinoma                 | 2 | nd   | nd   | 0  | 0  | 0  | nd   | nd | ND | 1      | 3  |
| 058/15    | 3 | simple solid carcinoma            | 1 | nd   | nd   | nd | nd | nd | nd   | nd | nd | 17     | nd |
| 059/15B   | 4 | complex carcinoma                 | 2 | 2.66 | 2.04 | 0  | 0  | 0  | 1.32 | 0  | 0  | 4      | 3  |
| 088/153-4 | 2 | duttal carcinoma                  | 1 | 3.73 | 1.66 | 1  | 1  | 0  | 2.24 | 0  | 0  | 3      |    |

|           |   |                                   |   |       |      |   |   |   |      |    |    |    |    |
|-----------|---|-----------------------------------|---|-------|------|---|---|---|------|----|----|----|----|
| 100/15    | 1 | simple tubulo-papillary carcinoma | 0 | 1.76  | 2.17 | 1 | 0 | 0 | 0.81 | 0  | 0  | 6  | 6  |
| 111/15_sx | 1 | complex carcinoma                 | 1 | 1.66  | 2.28 | 0 | 0 | 0 | 0.73 | 0  | 0  | 11 |    |
| 160/15_1  | 2 | mixed carcinoma                   | 2 | nd    | nd   | 0 | 0 | 0 | nd   | nd | nd | nd | 3  |
| 160/15_2  | 1 | simple tubulo-papillary carcinoma | 0 | 1.75  | 1.33 | 0 | 0 | 0 | 0.76 | 0  | 0  | 7  | 0  |
| 160/15_4  | 1 | simple tubular carcinoma          | 1 | nd    | nd   | 0 | 0 | 0 | nd   | nd | nd | 5  | 3  |
| 181/15_3  | 3 | micropapillary carcinoma          | 1 | 1.125 | 1.63 | 0 | 0 | 0 | 0.69 | 0  | 0  | 31 | nd |
| 189/15_SX | 1 | complex carcinoma                 | 2 | 1.79  | 1.65 | 0 | 0 | 0 | 1.08 | 0  | 0  | 20 | 3  |
| 190/15    | 3 | simple solid carcinoma            | 1 | 1.69  | 2.07 | 0 | 0 | 0 | 0.82 | 0  | 0  | 17 | nd |
| 194/15    | 1 | simple tubulo-papillary carcinoma | 1 | 1.75  | 2.08 | 0 | 0 | 0 | 0.84 | 0  | 0  | 17 | 4  |
| 201/15    | 1 | mixed carcinoma                   | 1 | 2.5   | 2.11 | 0 | 0 | 0 | 1.18 | 0  | 0  | 5  | 0  |
| 224/15_-1 | 2 | complex carcinoma                 | 1 | 1.43  | 1.87 | 0 | 0 | 0 | 0.76 | 0  | 0  | 16 | nd |
| 224/15_-2 | 2 | complex carcinoma                 | 2 | 2.34  | 2.25 | 0 | 0 | 0 | 1.04 | 0  | 0  | 17 | 5  |
| 281/15_-1 | 1 | simple tubulo-papillary carcinoma | 0 | 6.15  | 2.75 | 0 | 1 | 0 | 2.24 | 1  | 1  | nd | 4  |
| 281/15_-2 | 1 | intraductal papillary carcinoma   | 1 | 2.37  | 2.55 | 0 | 0 | 0 | 0.93 | 0  | 0  | 4  | 6  |
| 281/15_-3 | 1 | simple tubulo-papillary carcinoma | 0 | 2.47  | 1.45 | 0 | 0 | 0 | 1.7  | 0  | 0  | 1  | 4  |
| 282/15_-1 | 2 | mixed carcinoma                   | 1 | 3.92  | 2.25 | 0 | 0 | 0 | 1.74 | 0  | 0  | nd | 3  |

|          |   |                                   |   |      |      |    |    |   |      |    |    |    |    |
|----------|---|-----------------------------------|---|------|------|----|----|---|------|----|----|----|----|
| 282/15-2 | 1 | simple tubular carcinoma          | 1 | nd   | nd   | 0  | 0  | 0 | nd   | nd | nd | 7  | 5  |
| 282/15-3 | 3 | complex carcinoma                 | 2 | 1.38 | 1.55 | 0  | 0  | 0 | 0.88 | 0  | 0  | 32 | 0  |
| 298/15   | 1 | mixed carcinoma                   | 1 | 1.89 | 1.84 | 0  | 0  | 0 | 1.03 | 0  | 0  | 14 | 3  |
| 359/15   | 1 | mixed carcinoma                   | 2 | 2.36 | 2.17 | 1  | 0  | 0 | 1.08 | 0  | 0  | 4  | 0  |
| 400/15   | 2 | complex carcinoma                 | 1 | nd   | nd   | nd | nd | 0 | nd   | nd | nd | 16 | 3  |
| 401/15   | 3 | simple solid carcinoma            | 1 | 1.88 | 2.65 | 1  | 0  | 0 | 0.71 | 0  | 0  | nd | 0  |
| 475/15   | 3 | simple solid carcinoma            | 1 | 1.06 | 2.33 | 0  | 0  | 0 | 0.46 | 0  | 0  | 33 | 0  |
| 489/15   | 2 | inflammatory carcinoma            | 1 | 1.88 | 1.72 | 1  | 0  | 0 | 1.09 | 0  | 0  | 38 | 0  |
| 518/15-1 | 3 | simple solid carcinoma            | 0 | 1.93 | 2.44 | 0  | 0  | 0 | 0.8  | 0  | 0  | 40 | 0  |
| 518/15-2 | 2 | simple solid carcinoma            | 0 | 1.75 | 1.8  | 0  | 0  | 0 | 0.97 | 0  | 0  | 34 | 0  |
| 537/15   | 2 | complex carcinoma                 | 0 | nd   | nd   | 0  | 0  | 0 | nd   | nd | ND | 21 | 0  |
| 565/15   | 1 | complex carcinoma                 | 2 | 2.65 | 1.77 | 1  | 0  | 0 | 1.49 | 0  | 0  | nd | 4  |
| 576/15   | 1 | simple tubulo-papillary carcinoma | 1 | nd   | nd   | 0  | 0  | 0 | nd   | nd | nd | 4  | 3  |
| 584/15-1 | 1 | complex carcinoma                 | 1 | 1.85 | 1.63 | 1  | 1  | 0 | 1.13 | 0  | 0  | nd | nd |
| 584/15-2 | 1 | complex carcinoma                 | 1 | 1.63 | 1.75 | 0  | 0  | 0 | 0.93 | 0  | 0  | nd | nd |
| 602/15   | 1 | simple tubulo-papillary carcinoma | 1 | 4.24 | 1.72 | 0  | 1  | 0 | 2.47 | 0  | 1  | 12 | 6  |
| 614/15   | 3 | simple solid carcinoma            | 1 | 1.85 | 2.85 | 0  | 0  | 0 | 0.65 | 0  | 0  | 36 | 3  |
| 618/15-A | 3 | simple solid carcinoma            | 1 | 3.57 | 4.91 | 0  | 0  | 1 | 0.73 | 0  | 0  | 38 | 0  |

|           |   |                                                            |   |      |      |   |   |   |      |   |   |    |    |
|-----------|---|------------------------------------------------------------|---|------|------|---|---|---|------|---|---|----|----|
| 618/15-B  | 3 | simple solid carcinoma with neuroendocrine differentiation | 2 | 2.19 | 2.73 | 0 | 0 | 0 | 0.8  | 0 | 0 | 55 | 0  |
| 618/15-C2 | 3 | comedocarcinoma                                            | 1 | 2.15 | 2.09 | 0 | 0 | 0 | 1.03 | 0 | 0 | nd | 0  |
| 618/15-D1 | 3 | simple solid carcinoma                                     | 1 | 1.47 | 1.91 | 0 | 0 | 0 | 0.77 | 0 | 0 | nd | nd |
| 001/16    | 2 | simple tubulopapillary carcinoma                           | 2 | 4.38 | 1.97 | 0 | 0 | 0 | 2.22 | 1 | 1 | 10 | nd |
| 087/16    | 1 | simple tubular carcinoma                                   | 0 | 1.72 | 1.9  | 1 | 0 | 0 | 0.91 | 0 | 0 | 7  | nd |
| 101/16    | 1 | mixed carcinoma                                            | 1 | 1.8  | 1.87 | 1 | 0 | 0 | 0.96 | 0 | 0 | 4  | 3  |

**Figure S1.** Original blots.

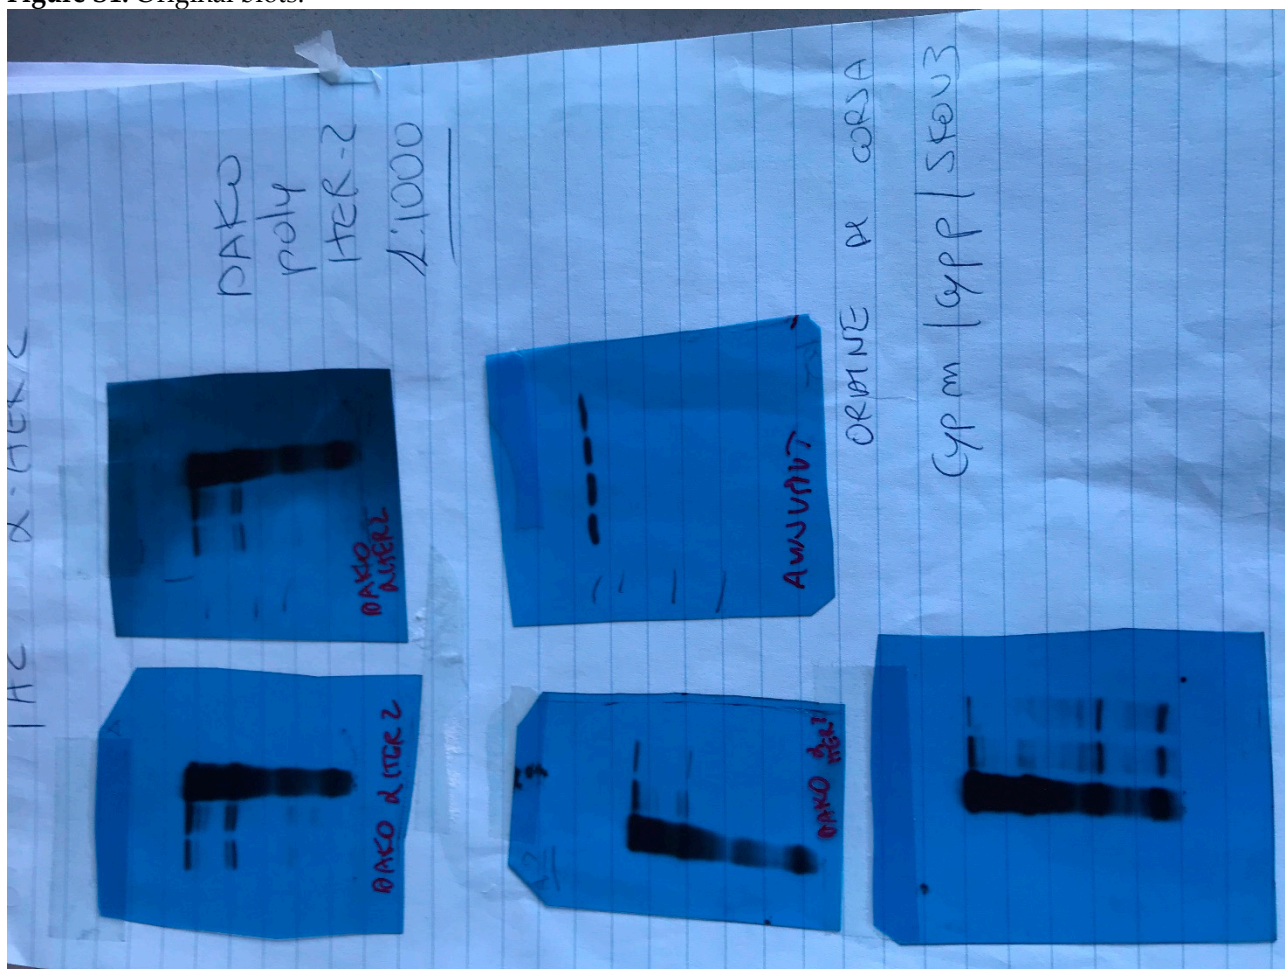

Supplement: s1 [file s1]
